# Supplementary material
Source: publisher site journal article supplement (https://www.dovepress.com/article/supplementary_file/613855/613855%20Appendix%20A_1.docx)

Appendix A: Interview guide for pharmacists (English version)


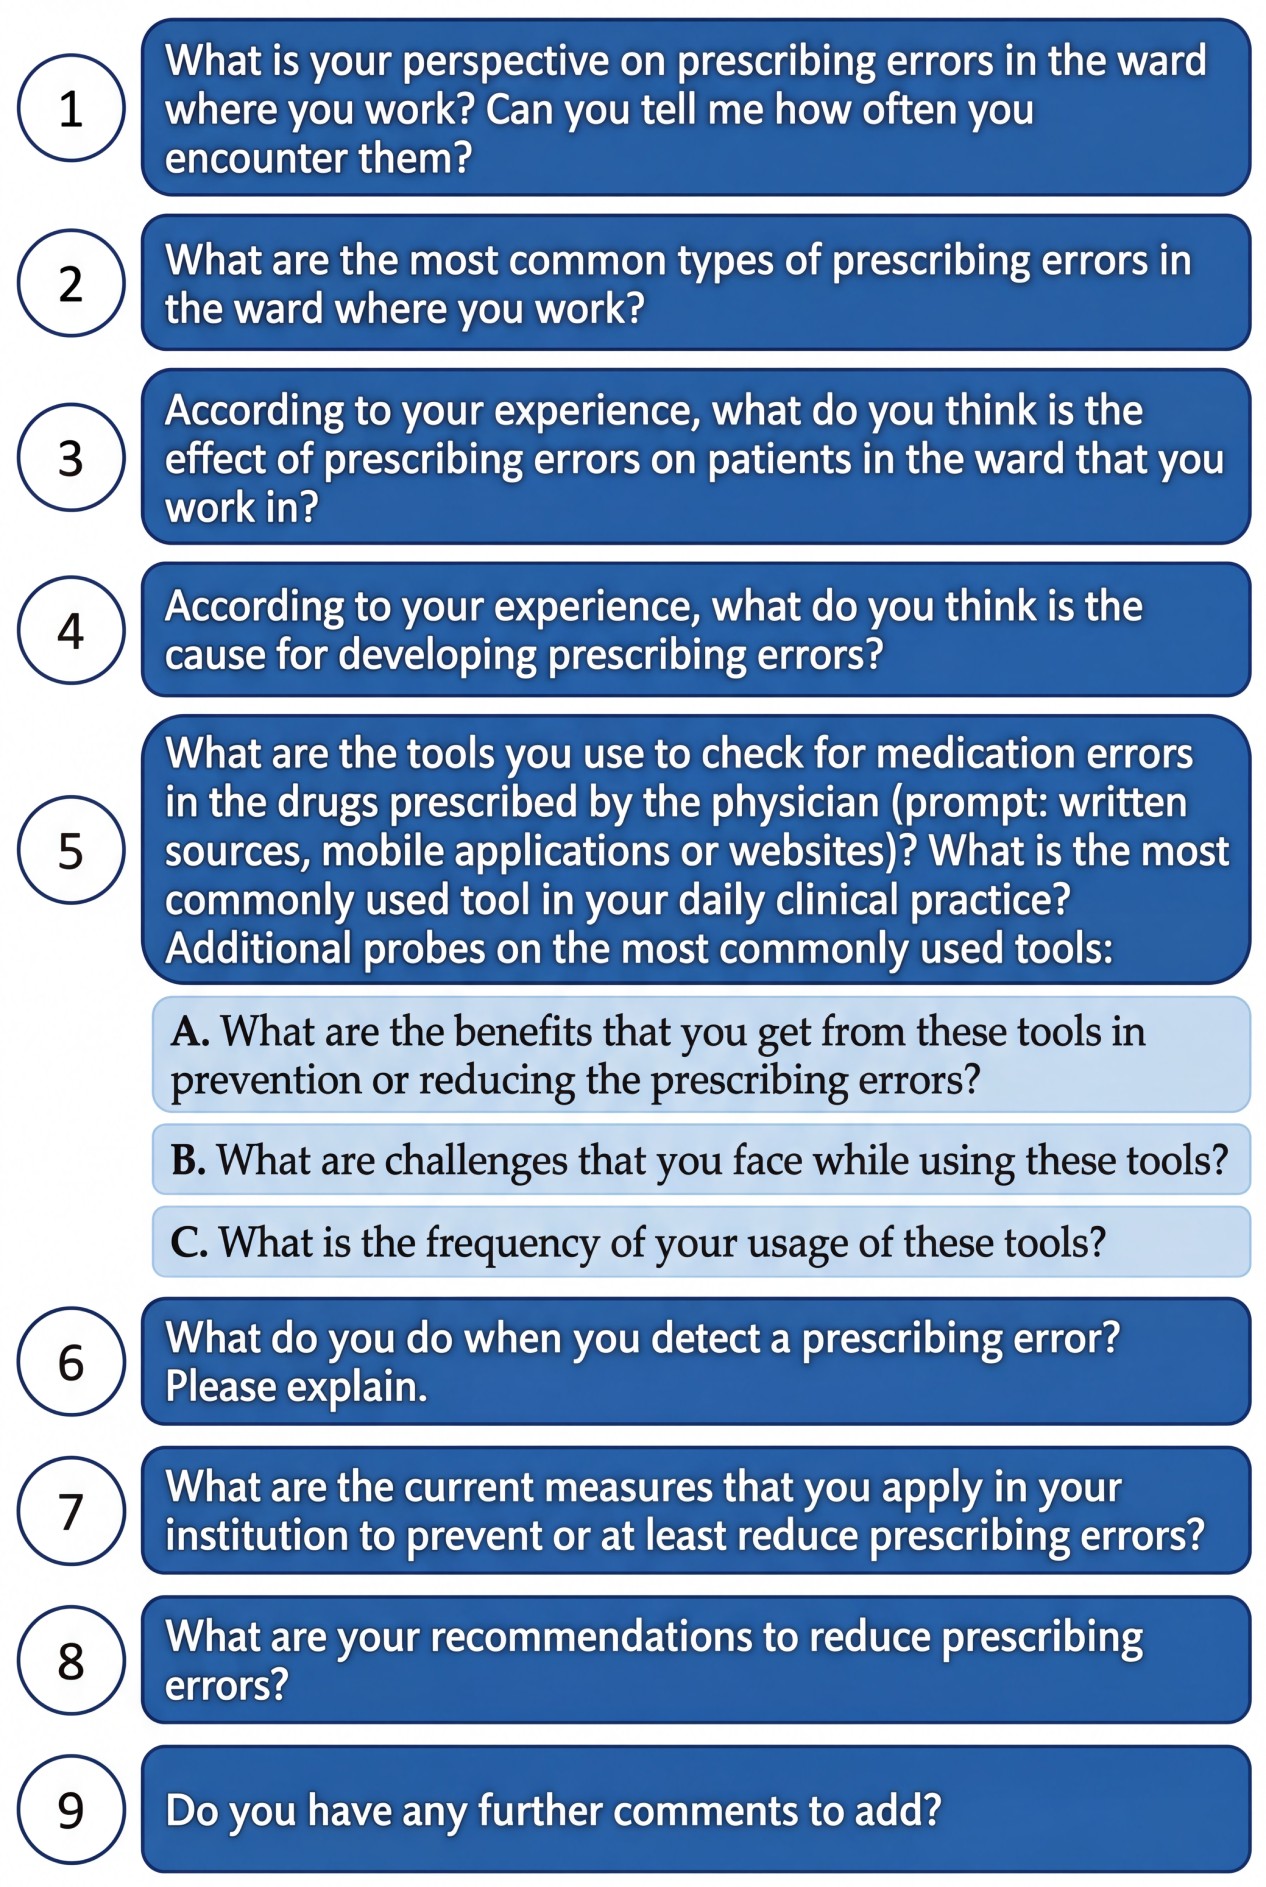

Supplement: Supplementary file 1 [file 613855%20Appendix%20A_1.docx]
